# Supplementary material for: Comparative Metabolomics and Transcriptome Analysis Reveal the Fragrance-Related Metabolite Formation in Phoebe zhennan Wood
Source: MDPI journal article supplement (doi:10.3390/molecules28207047), 2023-10-12
Supplement: s1 [file s1]

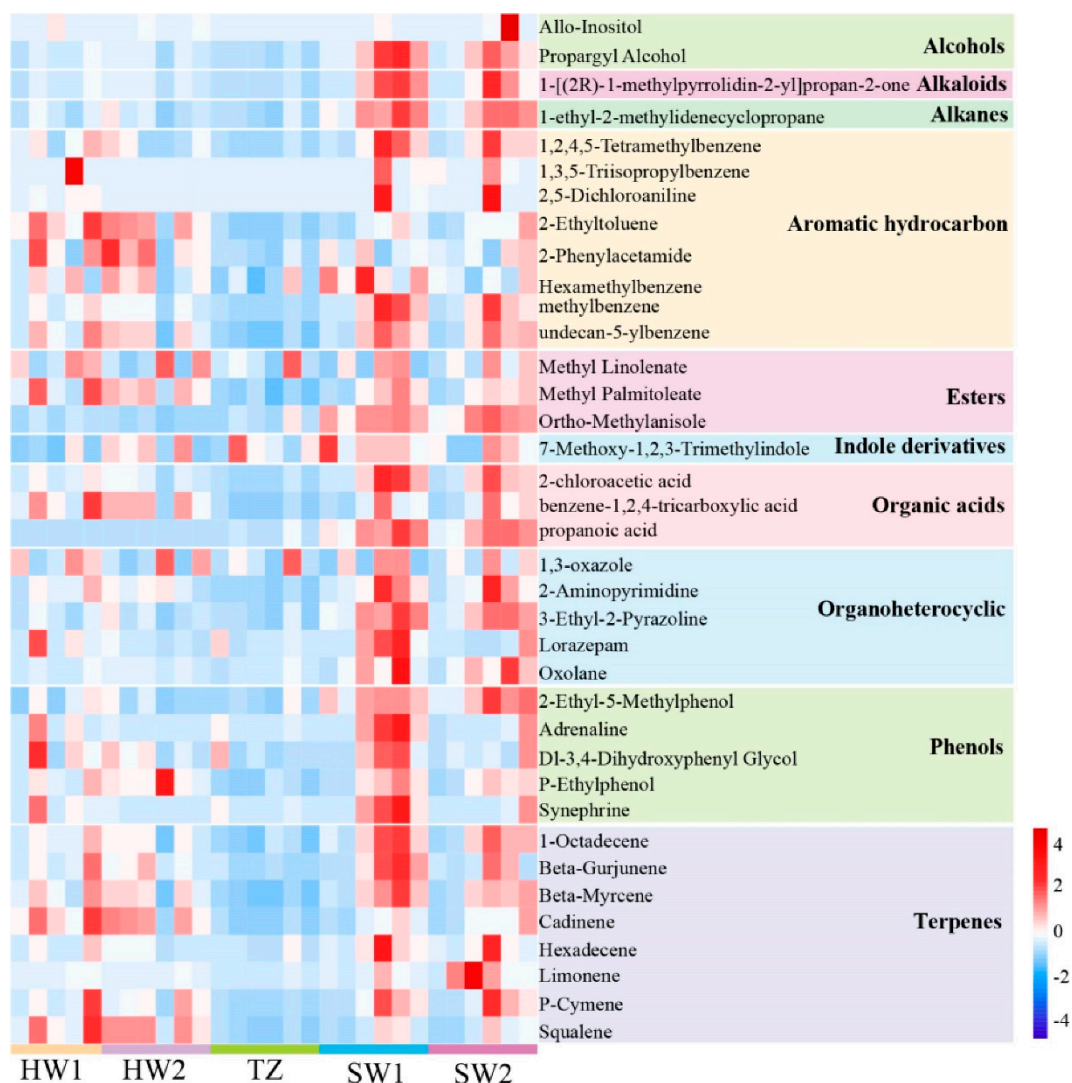

**Figure S1.** Heatmap of the accumulation of 10 superclasses of metabolites in HW, SW, and TZ

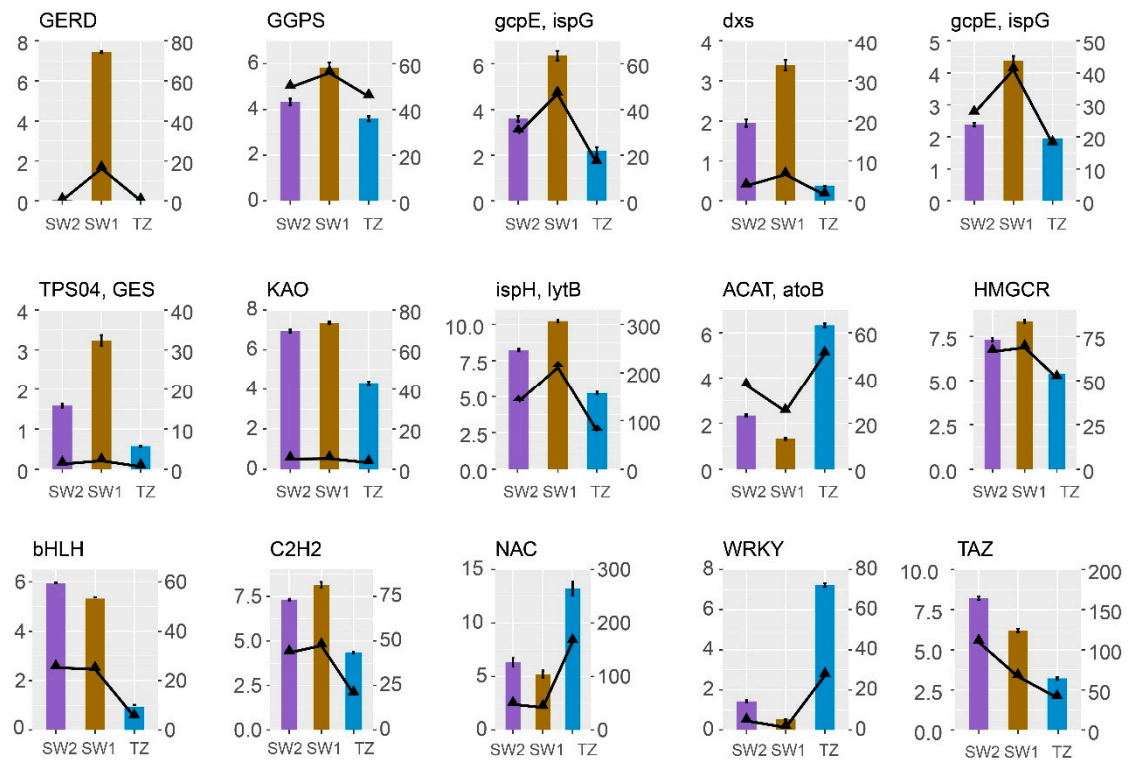

**Figure S2.** The RT-qPCR analysis of the relative level (left) and fragment per kilobase per million reads (FPKM) (right) of 10 enzyme genes and 5 transcription factors in SW1, SW2, and TZ.

The column showed the relative expression level, the line showed the FPKM value.
